# Supplementary material
Source: publisher figshare collection journal article supplement (https://sage.figshare.com/ndownloader/files/21481686)
Supplement: Supplementary file 1 [file 21481686]

| **Embase (1902)** | **Medline1 (1516)** |
| --- | --- |
| 1. Hip arthroplasty/ or ((hip adj2 (replacement or arthroplasty)).ti,ab,kw.) 2. Anterior.ti,ab,kw. or ((smith adj2 peters*).ti,ab,kw.)   1 and 2 | 1. Arthroplasty, Replacement, Hip/ or ((hip adj2 (replacement or arthroplasty)).ti,ab,kf.) 2. Anterior.ti,ab,kf. or ((smith adj2 peters*).ti,ab,kf.) 3. 1 and 2 |

1. OVID Medline Epub Ahead of Print, In-Process & Other Non-Indexed Citations, Ovid MEDLINE(R) Daily and Ovid MEDLINE(R) 1946 to Present

| **Web of Science (1532)** | **CINAHL (737)** |
| --- | --- |
| TS=(hip NEAR/2 arthroplasty) AND (anterior OR (smith NEAR/2 peters*)))  Refined by: DOCUMENT TYPES: ( ARTICLE OR CLINICAL TRIAL )  Timespan: All years. Databases: WOS, BIOSIS, KJD, RSCI, SCIELO. | S1. (MH "Arthroplasty, Replacement, Hip") OR "hip N3 (replace* or arthroplasty)"  S2. “anterior” OR ”smith N3 peters”  S3. S1 AND S2 |
